# Supplementary figures and images for: Computational Analysis Reveals the Temporal Acquisition of Pathway Alterations during the Evolution of Cancer
Source: MDPI journal article supplement (doi:10.3390/cancers14235817), 2022-11-25

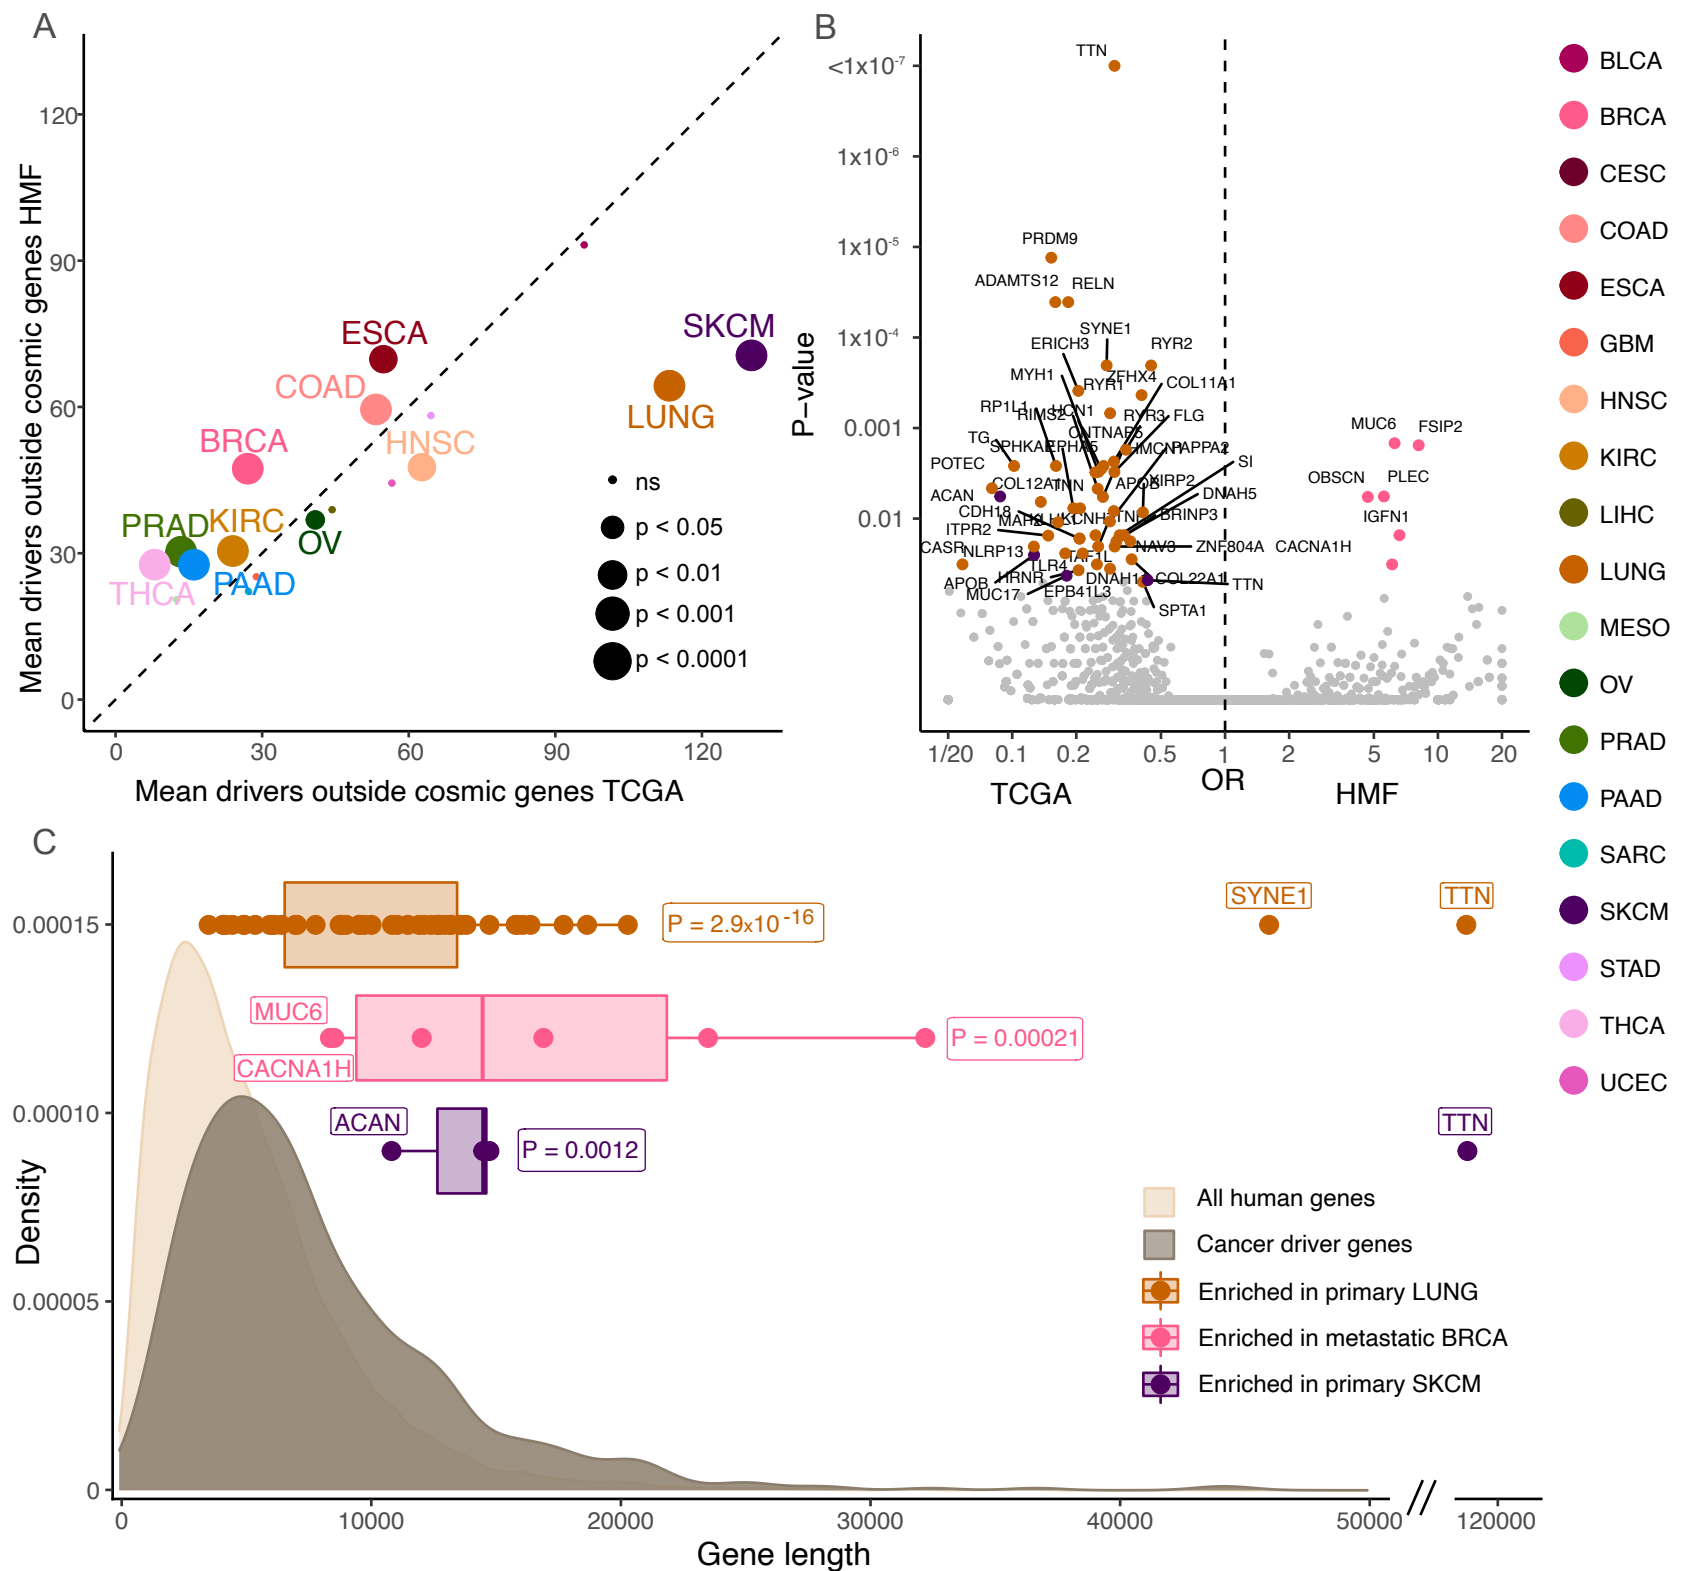

Supplement: s1 [file s1]

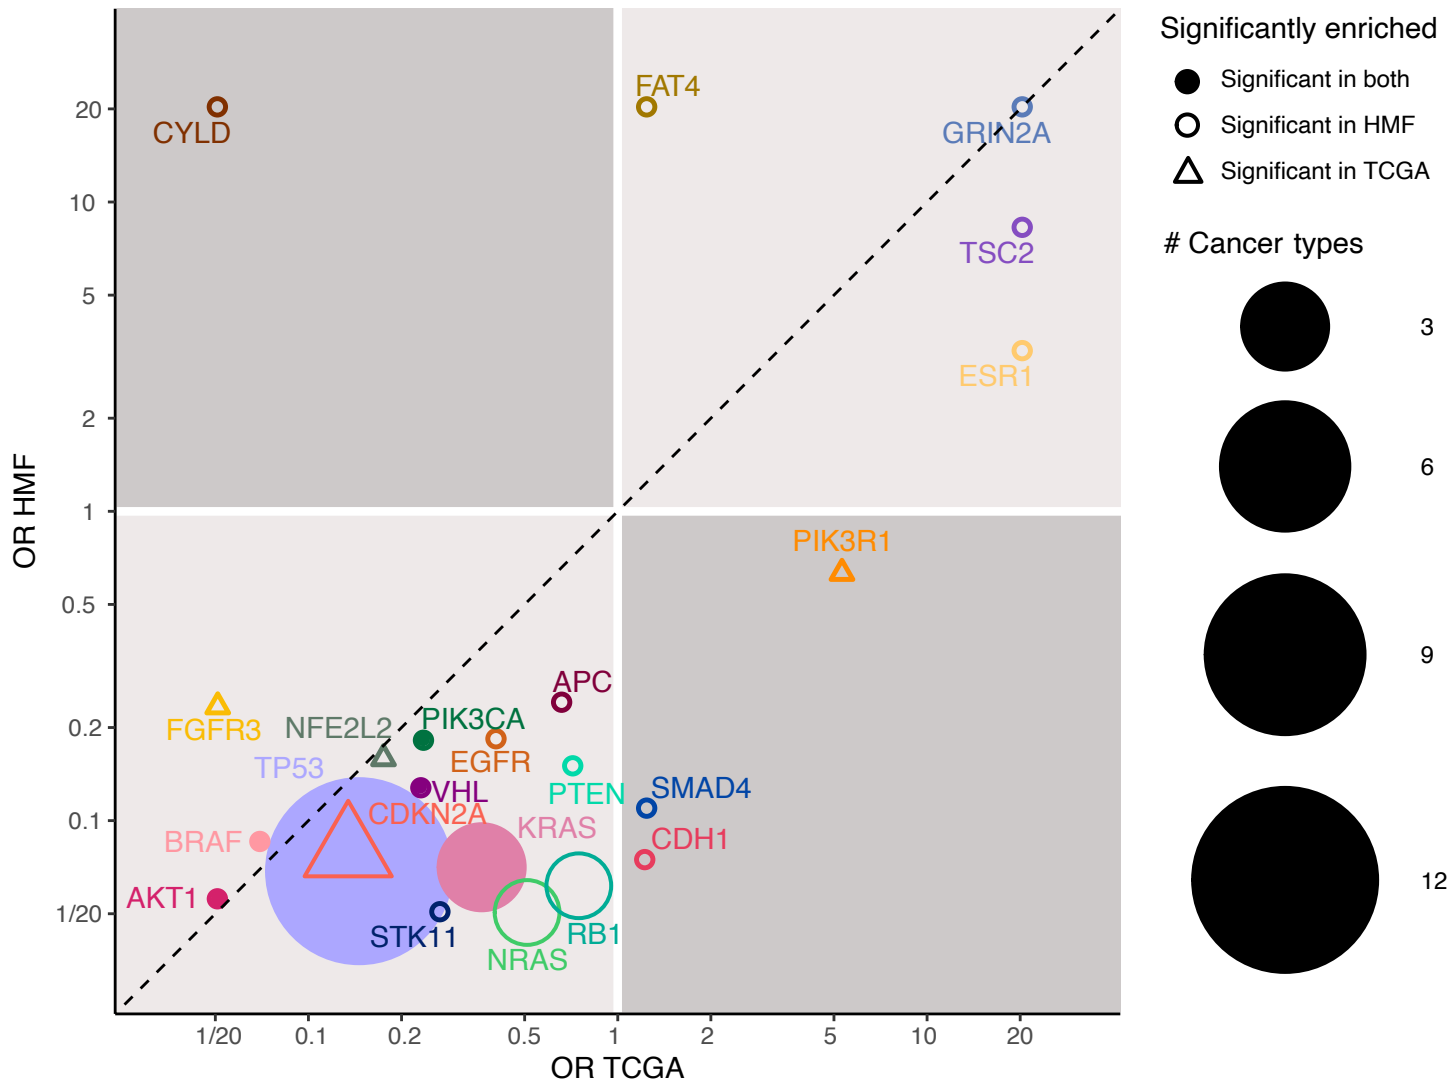

Supplement: s1 [file s1]

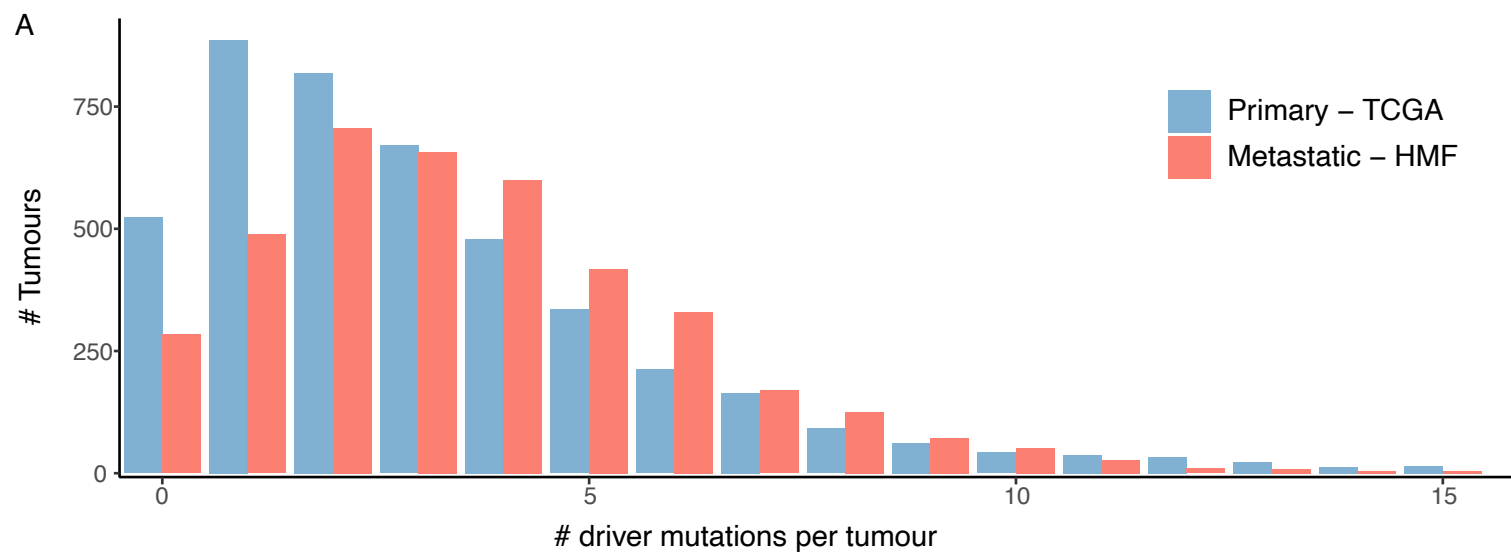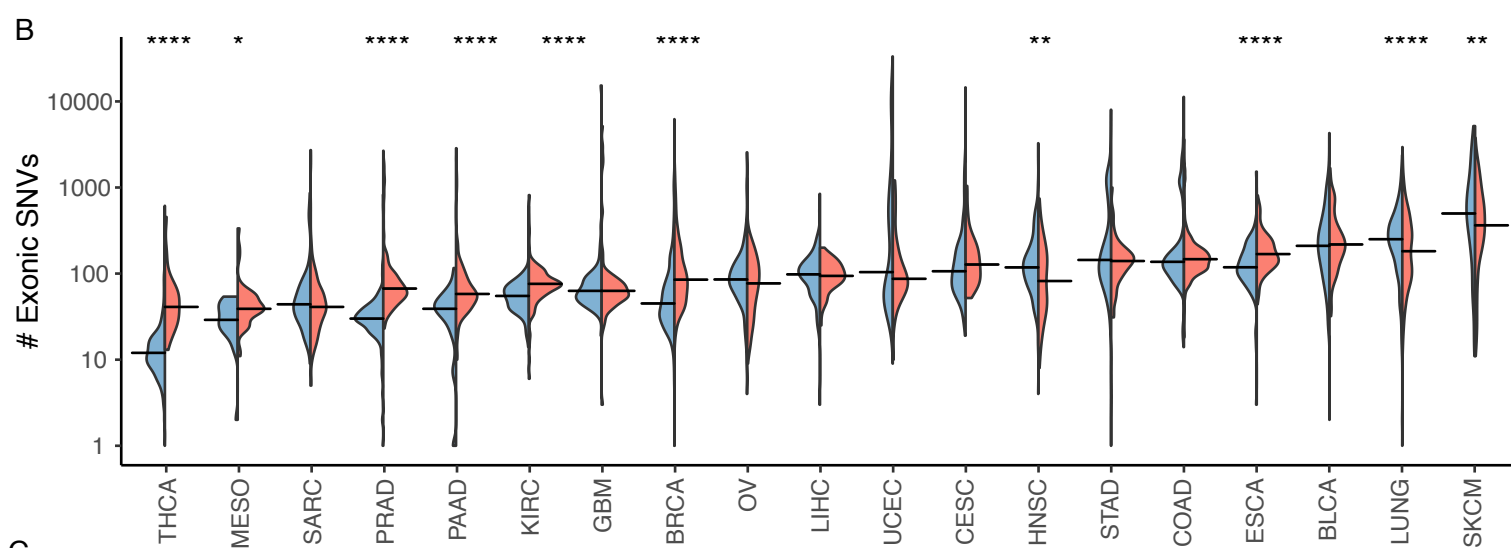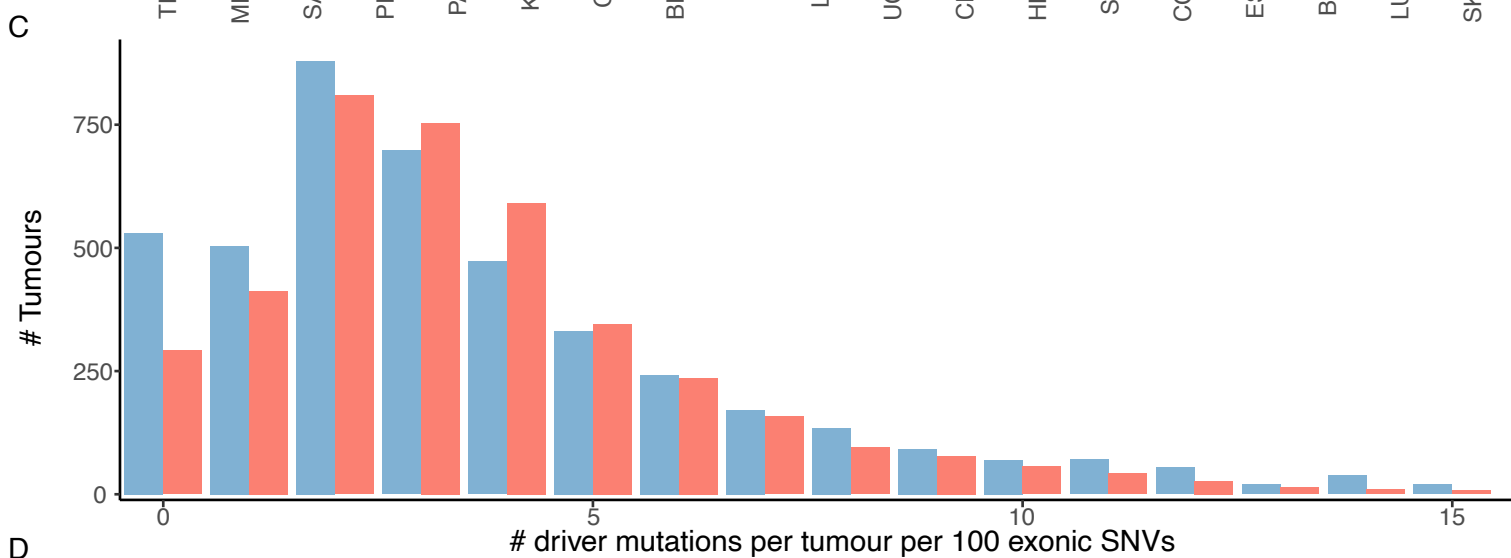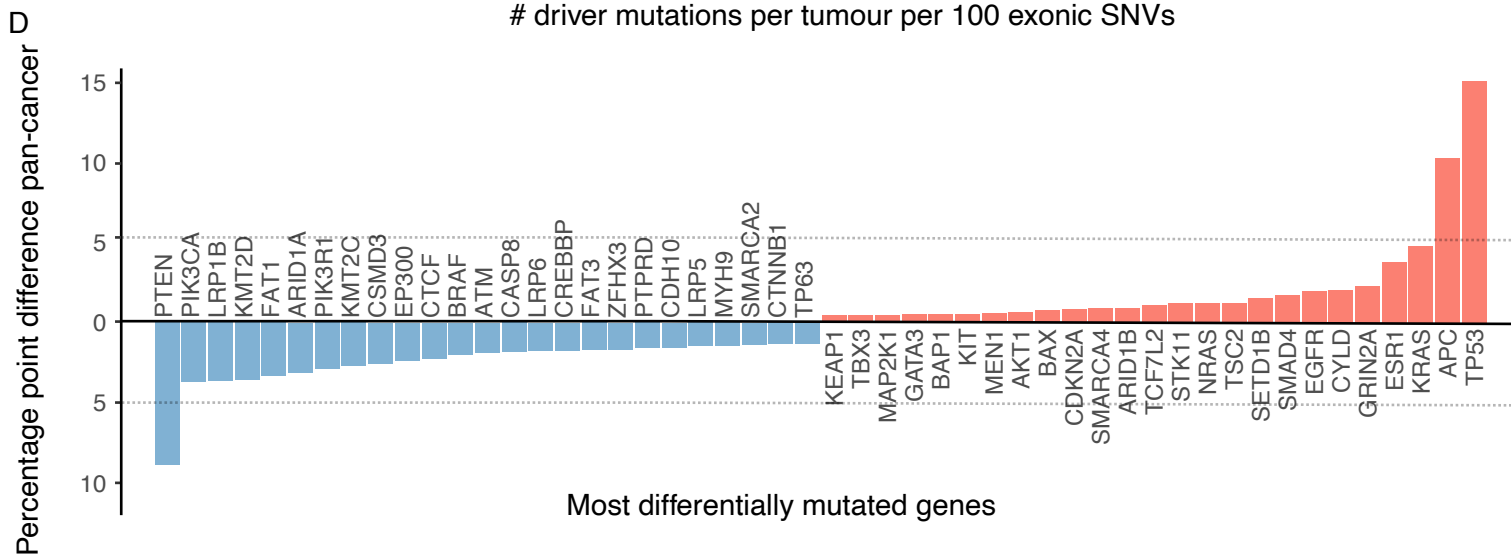

Supplement: s1 [file s1]

**A**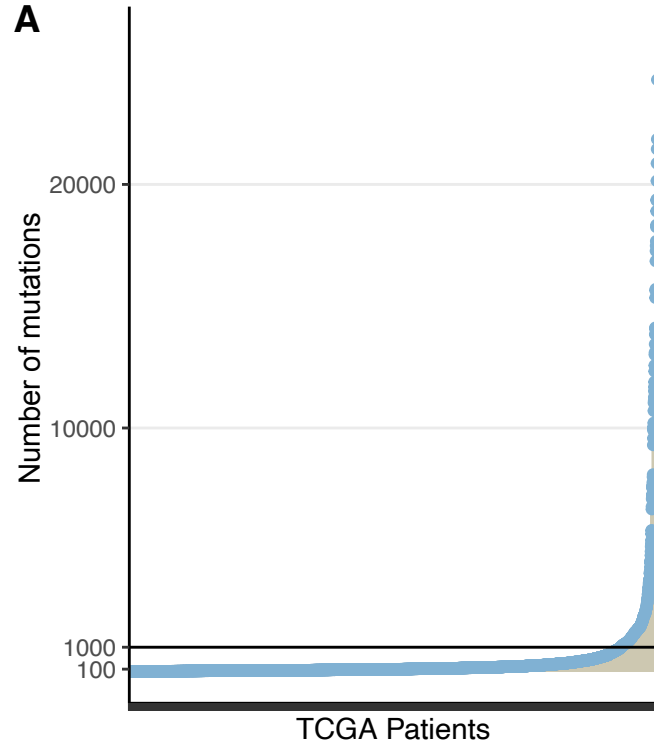**B**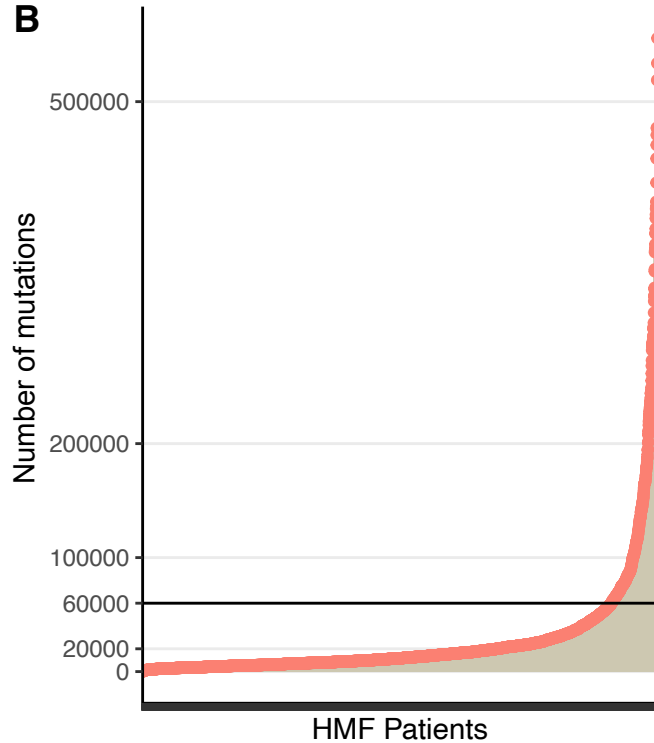

Supplement: s1 [file s1]
